# Supplementary material
Source: PubMed Central journal article supplement (PMC5023385)
Supplement: mt2016137x1.pdf [file mt2016137x1.pdf]

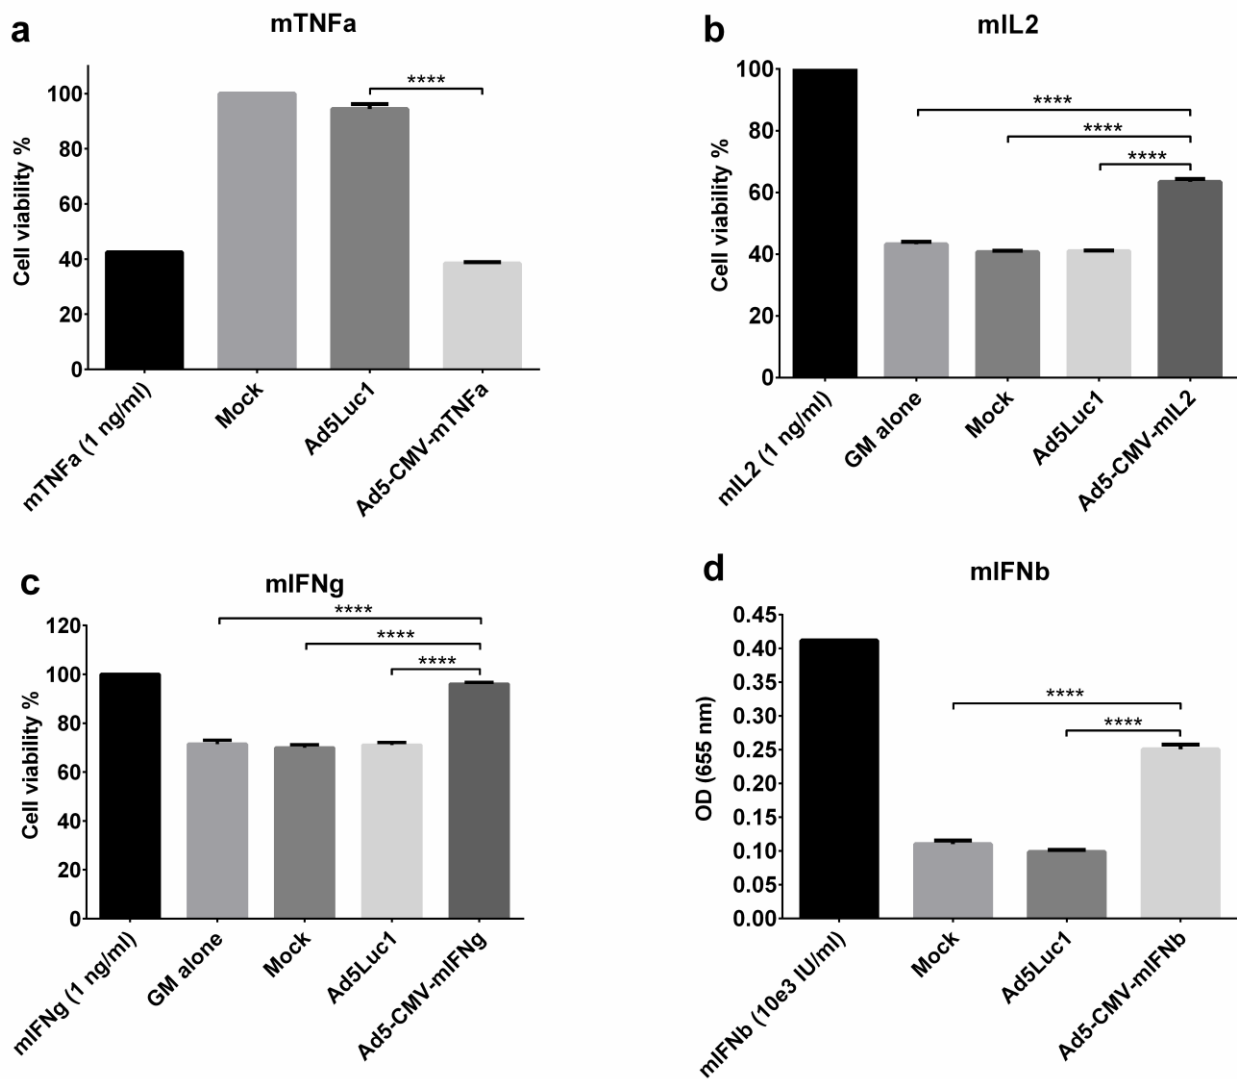

**Supplementary Figure S1. Cytokine functionality.** (a) TNFa-sensitive mouse L-929 cells were cultured in the presence of supernatants from cells infected with Ad5-CMV-mTNFa. Cell viability was determined 24 hours later. (b) IL-2-dependent murine T cells (CTLL-2) were cultured in the presence of supernatants from cell infected with Ad5-CMV-mIL2. Cell viability was determined 48 hours later. (c) L-929 cells were incubated for 6 hours with supernatants from Ad5-CMV-mIFNg – infected cells and subsequently infected with vesicular stomatitis virus strain M51 ( $1 \times 10^4$  VP/well). Cell viability was determined 96 hours later. (d) Murine type I IFNs sensor cells (B16-Blue IFN- $\alpha/\beta$ ) were cultured in the presence of supernatants from cells infected with Ad5-CMV-mIFNb. Secreted alkaline phosphatase (SEAP) levels were measured from the supernatants 24 hours later by reading

OD at 655 nm. Commercially available murine cytokines served as positive controls in all functionality assays. Ad5luc1 and normal growth medium were used as negative controls.
